# Supplementary material
Source: Research Square preprint supplement (doi:10.21203/rs.3.rs-9504736/v1)

Western Blot  
Figure 6D

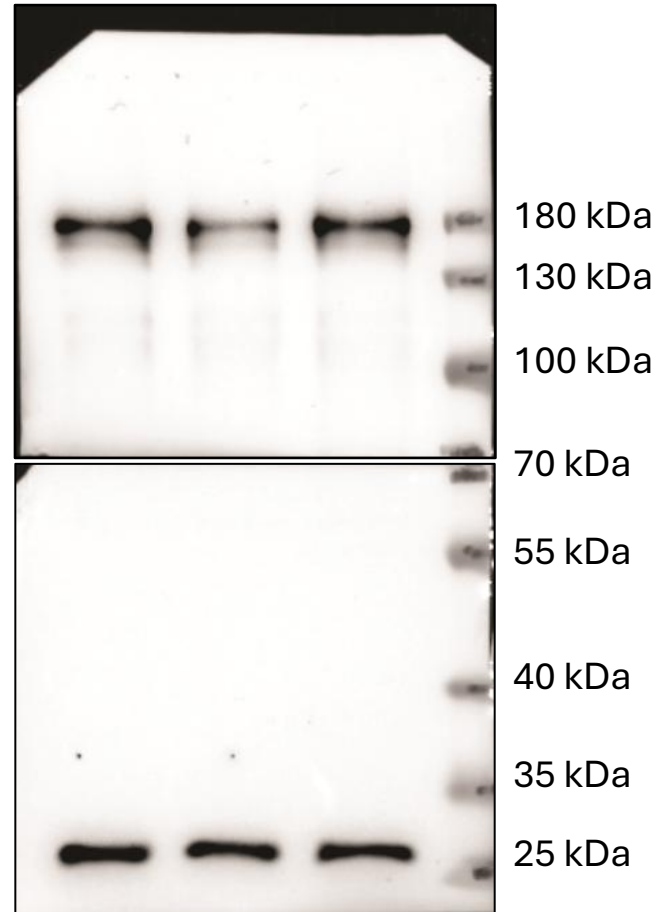

Western Blot  
Figure 6E

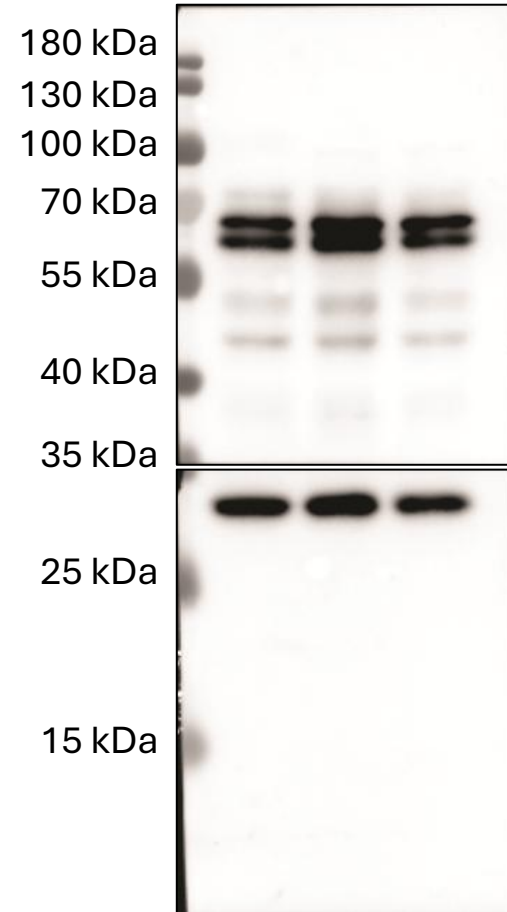

Western Blot Figure 8C

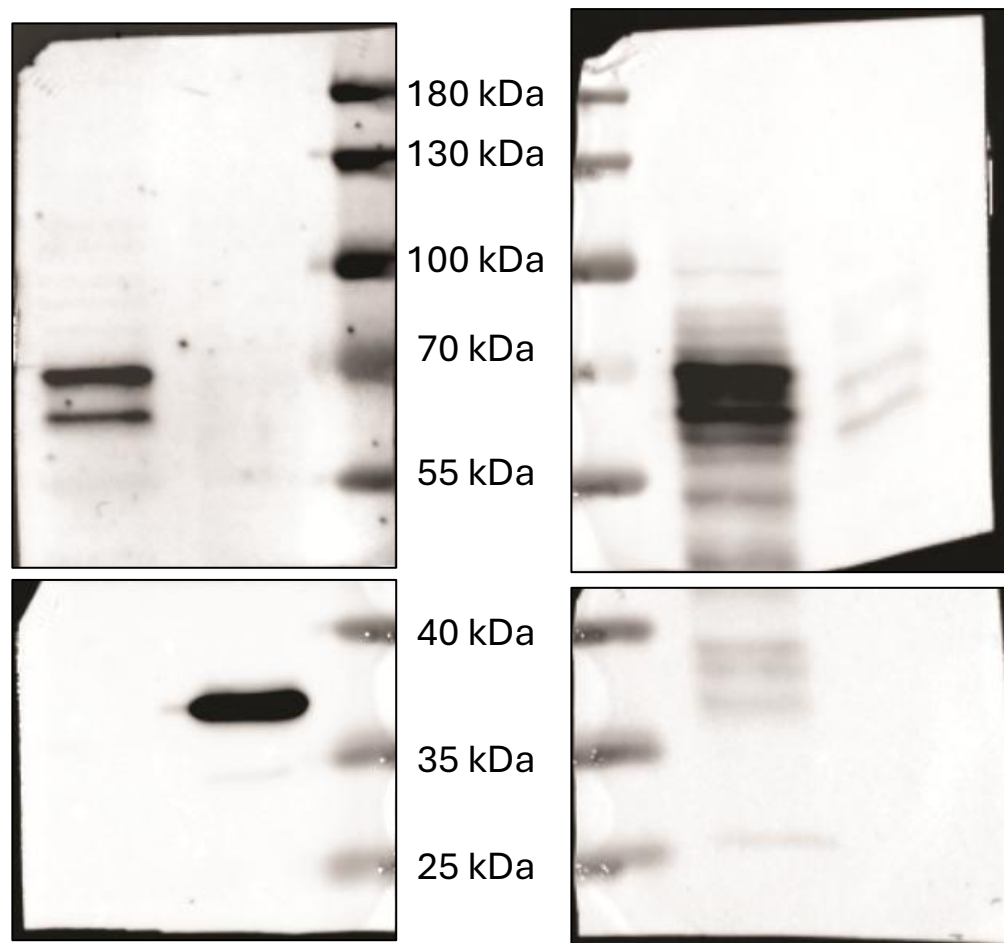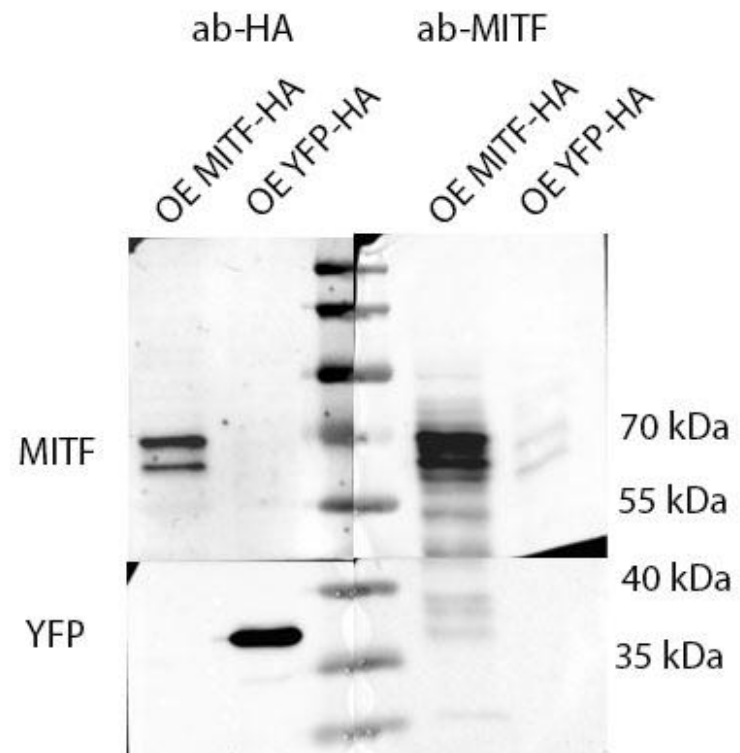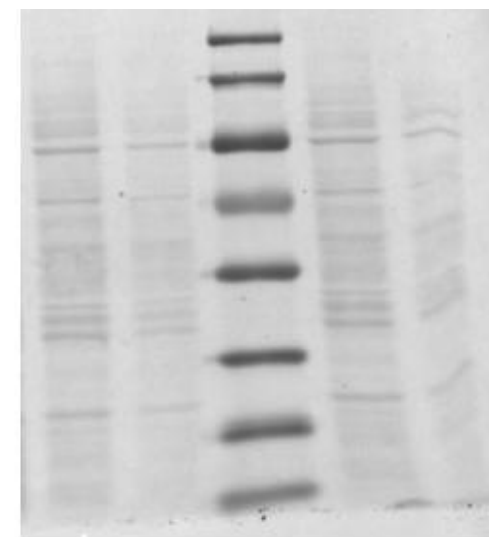

TPS

Gel Figure 8A

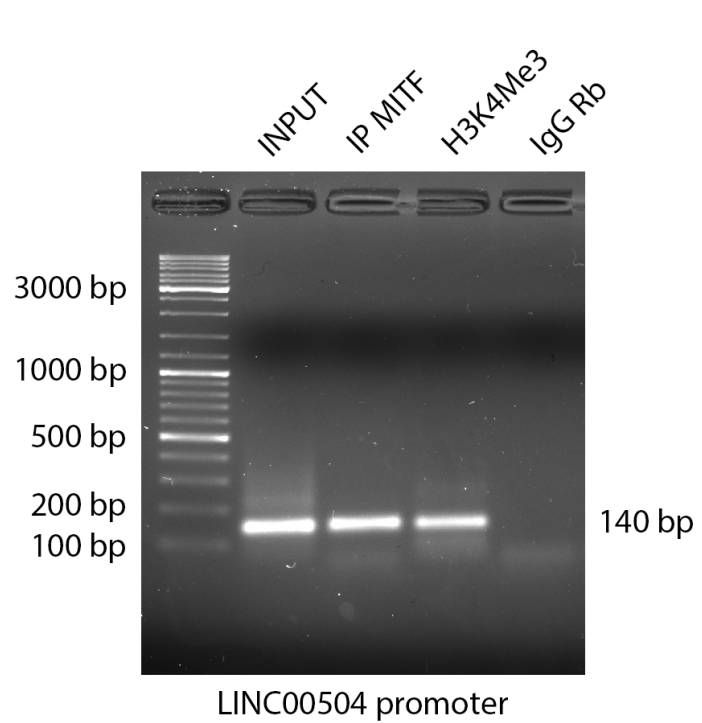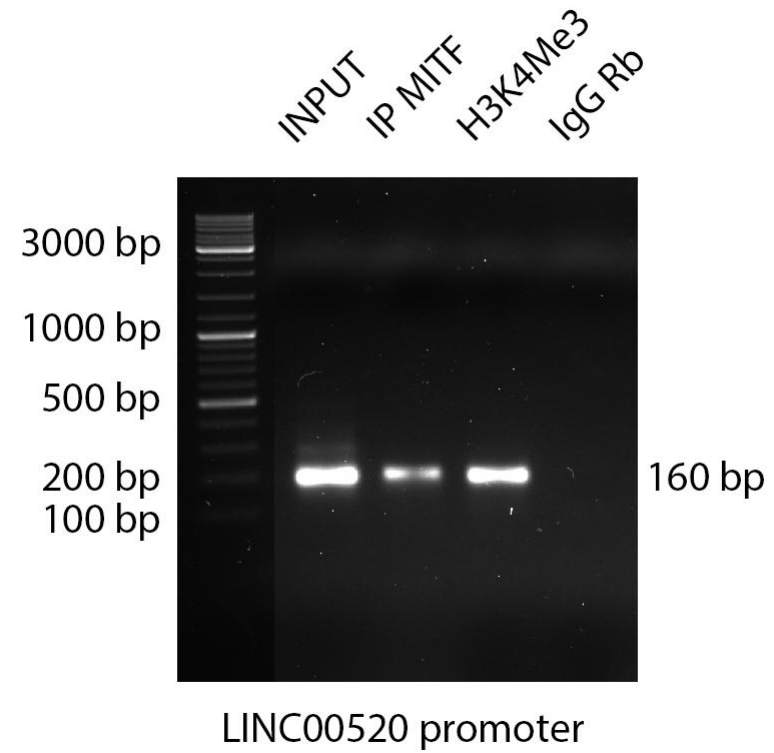

Supplement: Supplementary file 1 [file e1b044e2d60610492711f335.pdf]
